# Supplementary material
Source: PubMed Central journal article supplement (PMC3806529)
Supplement: supp_mct197_mct197supp.pdf [file supp_mct197_mct197supp.pdf]

## SUPPLEMENTARY DATA

TABLE S1. Origin of plant material of *Disa* and *Brownleea* examined. Order of taxa and species follows Bytebier *et al.* (2008). Abbreviations for geographical regions follow Brummitt (2001). Herbarium codes: BOL = Bolus Herbarium, University of Cape Town, South Africa, NU = Bews Herbarium, University of KwaZulu-Natal, South Africa. s.n. = no collection number available.

| Taxon                                       | Origin                                    | Collector, collection number, herbarium, accession number |
|---------------------------------------------|-------------------------------------------|-----------------------------------------------------------|
| <b>Brownleea</b>                            |                                           |                                                           |
| <i>Brownleea galpinii</i> ssp. <i>major</i> | NAT, Bushman's Nek                        | Hobbhahn, 005, BOL                                        |
| <i>Brownleea macroceras</i>                 | CPP-EC, Naude's Nek                       | Hobbhahn, 006, NU 0037314                                 |
| <i>Brownleea parviflora</i>                 |                                           | Unknown, s.n., NU 0037322                                 |
| <b>Disa</b>                                 |                                           |                                                           |
| <i>Disa caulescens</i>                      | CPP-WC, Bain's Kloof                      | Hobbhahn, 007, BOL                                        |
| <i>Disa filicornis</i>                      |                                           | Linder, s.n., BOL 312                                     |
| <i>Disa racemosa</i>                        | CPP-WC, Cape Point                        | Hobbhahn, s.n., BOL 2726                                  |
| <i>Disa tripetaloides</i>                   |                                           | Linder, 1750, BOL 538                                     |
| <i>Disa uniflora</i>                        | CPP-WC, Table Mountain                    | Hobbhahn, s.n., BOL 2713                                  |
| <i>Disa uniflora</i>                        | CPP-WC, Grootwinterhoek Wilderness Area   | Hobbhahn, 033, NU 0037293                                 |
| <b>Atromaculiferae</b>                      |                                           |                                                           |
| <i>Disa glandulosa</i>                      | CPP-WC, Table Mountain                    | Hobbhahn, 008, BOL                                        |
| <i>Disa vaginata</i>                        | CPP-WC, Table Mountain                    | Bruyns, 1238, BOL 392                                     |
| <i>Disa vaginata</i>                        | CPP-WC, Table Mountain                    | Hobbhahn, 032, NU 0037294                                 |
| <b>Phlebidia</b>                            |                                           |                                                           |
| <i>Disa longicornu</i>                      | CPP-WC, Table Mountain                    | Hobbhahn, 009, NU 0037307                                 |
| <b>Pardoglossa</b>                          |                                           |                                                           |
| <i>Disa rosea</i>                           | CPP-WC, Table Mountain                    | Linder, s.n., BOL 427                                     |
| <b>Ovalifoliae</b>                          |                                           |                                                           |
| <i>Disa ovalifolia</i>                      |                                           | Linder, 5871, BOL 2289; Burger, s.n., BOL 2100            |
| <b>Schizodium</b>                           |                                           |                                                           |
| <i>Disa flexuosa</i>                        | CPP-WC, Villiersdorp                      | Hobbhahn, 010, BOL                                        |
| <i>Disa obliqua</i> ssp. <i>obliqua</i>     | CPP-WC, Table Mountain                    | Hobbhahn, 035, NU 0037295                                 |
| <i>Disa satyrioides</i>                     |                                           | Linder, s.n., BOL 1432                                    |
| <b>Vaginaria</b>                            |                                           |                                                           |
| <i>Disa fasciata</i>                        | CPP-WC, Hottentots Holland Nature Reserve | Hobbhahn, 028, NU 0037301; 036, NU 0037290                |
| <b>Coryphaea</b>                            |                                           |                                                           |
| <i>Disa rungweensis</i>                     | TVL-MP, Long Tom Pass                     | SD Johnson, s.n., NU 0037312                              |
| <i>Disa sagittalis</i>                      |                                           | Unknown, s.n., NU 0037299                                 |
| <i>Disa triloba</i>                         |                                           | Esterhuysen, 34157, BOL 1378                              |
| <b>Disella</b>                              |                                           |                                                           |
| <i>Disa bodkinii</i>                        |                                           | Bruyns, 1544, BOL 203                                     |
| <i>Disa elegans</i>                         |                                           | Oliver, s.n., BOL 320                                     |
| <i>Disa elegans</i>                         | CPP-WC, Grootwinterhoek                   | Hobbhahn, 012, NU 0037309                                 |
| <i>Disa obtusa</i> ssp. <i>hottentotica</i> | CPP-WC, Hottentots Holland Nature Reserve | Hobbhahn, 013, BOL                                        |
| <i>Disa uncinata</i>                        |                                           | Linder, 1689, BOL 551                                     |

Monadenia

|                         |                                           |                           |
|-------------------------|-------------------------------------------|---------------------------|
| <i>Disa atrorubens</i>  |                                           | Linder, 1129, BOL 918     |
| <i>Disa bolusiana</i>   | CPP-WC, Swartberg Nature Reserve          | Bytebier, 2572, NU        |
| <i>Disa bracteata</i>   |                                           | Chesselet, 13, BOL 2035   |
| <i>Disa bracteata</i>   | CPP-WC, Villiersdorp                      | Hobbhahn, 011, BOL        |
| <i>Disa brevicornis</i> | NAT, Mount Gilboa, Midlands               | Hobbhahn, 029, NU 0037298 |
| <i>Disa comosa</i>      | CPP-WC, Middelburg Pass                   | Hobbhahn, 023, NU 0037313 |
| <i>Disa comosa</i>      | CPP-WC, Table Mountain                    | Hobbhahn, 022, NU 0037310 |
| <i>Disa cylindrica</i>  |                                           | Kurzweil, 904, BOL 1568   |
| <i>Disa cylindrica</i>  | CPP-WC, Hottentots Holland Nature Reserve | Hobbhahn, 024, BOL        |
| <i>Disa ophrydea</i>    |                                           | Kurzweil, 923, BOL 1336   |
| <i>Disa ophrydea</i>    | CPP-WC, Hottentots Holland Nature Reserve | Hobbhahn, 037, NU 0037248 |
| <i>Disa rufescens</i>   | CPP-WC, Hottentots Holland Nature Reserve | Hobbhahn, 025, BOL        |
| <i>Disa sabulosa</i>    | CPP-WC, Betty's Bay                       | Hobbhahn, 014, NU 0037306 |

Reticulibractea

|                                                  |                      |                           |
|--------------------------------------------------|----------------------|---------------------------|
| <i>Disa harveiana</i> ssp. <i>longicalcarata</i> | CPP-WC, Dasklip Pass | Hobbhahn, s.n., BOL 2728  |
| <i>Disa karooica</i>                             | CPP-NC, Leliefontein | Hobbhahn, 015, NU 0037302 |

Repandra

|                     |                       |                           |
|---------------------|-----------------------|---------------------------|
| <i>Disa cornuta</i> | CPP-WC, Cape Point    | Hobbhahn, 034, NU 0037291 |
| <i>Disa tysonii</i> | CPP-EC, Bastervoetpad | Hobbhahn, 016, BOL        |
| <i>Disa tysonii</i> |                       | Linder, 806, BOL 516      |

Trichochila

|                          |                        |                                            |
|--------------------------|------------------------|--------------------------------------------|
| <i>Disa graminifolia</i> |                        | Linder, 1763, BOL 819                      |
| <i>Disa hians</i>        |                        | Linder, 1731, BOL 849                      |
| <i>Disa salteri</i>      |                        | Langley, s.n., BOL; Langley, s.n. BOL 2541 |
| <i>Disa salteri</i>      | CPP-WC, Safraansrivier | Hobbhahn, 017, BOL                         |
| <i>Disa tenuis</i>       |                        | Linder, s.n., BOL 394                      |

Stenocarpa

|                                                     |                            |                                |
|-----------------------------------------------------|----------------------------|--------------------------------|
| <i>Disa aristata</i>                                |                            | Davidson, 3270, BOL 406        |
| <i>Disa cephalotes</i> ssp. <i>cephalotes</i>       | NAT, Witsieshoek           | Van der Niet, s.n., NU 0037297 |
| <i>Disa gladioliflora</i> ssp. <i>gladioliflora</i> | CPP-EC, Tierkop, Langeberg | Hobbhahn, s.n., BOL 2729       |
| <i>Disa nivea</i>                                   | CPP-EC, Bastervoetpad      | Hobbhahn, 018, BOL             |
| <i>Disa saxicola</i>                                |                            | Unknown, s.n., NU 0037311      |
| <i>Disa stricta</i>                                 |                            | Unknown, s.n., NU 0037316      |
| <i>Disa vigilans</i>                                | TVL-MP, Mokobulaan         | Bellstedt, 827, NU             |

Emarginatae

|                                               |                             |                          |
|-----------------------------------------------|-----------------------------|--------------------------|
| <i>Disa nervosa</i>                           | NAT, Hella Hella            | Hobbhahn, s.n., BOL 2730 |
| <i>Disa patula</i> var. <i>transvaalensis</i> | NAT, Mount Gilboa, Midlands | Hobbhahn, s.n., BOL 2721 |
| <i>Disa stachyoides</i>                       | NAT, Mount Gilboa, Midlands | Hobbhahn, s.n., BOL 2724 |

Spirales

|                                         |                            |                       |
|-----------------------------------------|----------------------------|-----------------------|
| <i>Disa brachyceras</i>                 | CPP-WC, Shaw's Pass        | Bytebier, 2607, NU    |
| <i>Disa tenella</i> ssp. <i>tenella</i> | CPP-WC, Mamre Road Station | Linder, 1124, BOL 520 |

Aconitoideae

|                                                    |                                    |                                         |
|----------------------------------------------------|------------------------------------|-----------------------------------------|
| <i>Disa aconitoides</i> ssp.<br><i>aconitoides</i> |                                    | Linder, 1920, BOL 211                   |
| <i>Disa aconitoides</i> ssp.<br><i>aconitoides</i> | NAT, Howick                        | Unknown, 49, NU                         |
| <i>Disa similis</i>                                |                                    | Unknown, 165, NU 0037318                |
| Micranthae                                         |                                    |                                         |
| <i>Disa chrysostachya</i>                          | NAT, Mount Gilboa, Midlands        | Hobbhahn, s.n., BOL 2723                |
| <i>Disa chrysostachya</i>                          | CPP-EC, Coldstream                 | Hobbhahn, 020, NU 0037296               |
| <i>Disa cooperi</i>                                | NAT, Himeville Nature Reserve      | Hobbhahn, 021, NU 0037305               |
| <i>Disa crassicornis</i>                           | CPP-EC, Bastervoedpad              | Hobbhahn, 030, NU 0037304               |
| <i>Disa erubescens</i> ssp.<br><i>erubescens</i>   | MLW, Mt. Mlanje                    | Kurzweil, 1404, BOL 1920                |
| <i>Disa fragrans</i> ssp.<br><i>fragrans</i>       | NAT, Witsieshoek                   | Hobbhahn, s.n., BOL 2727                |
| <i>Disa galpinii</i>                               | CPP-EC, Naude's Nek                | Hobbhahn, 026, BOL                      |
| <i>Disa hircicornis</i>                            | NAT, Table Mountain                | Unknown, 160, NU 0037319                |
| <i>Disa polygonoides</i>                           | NAT, Vernon Crookes Nature Reserve | Hobbhahn, 027, BOL                      |
| <i>Disa rhodantha</i>                              | TVL-MP, Graskop                    | SD Johnson, s.n., NU 0037303            |
| <i>Disa sanguinea</i>                              |                                    | Unknown, s.n., NU 0037315               |
| <i>Disa sanguinea</i>                              | NAT, Sani Pass                     | McMurtry, s.n., NU 0037320              |
| <i>Disa sankeyi</i>                                | NAT, Bushman's Nek                 | Cozien & Van der Niet, s.n., NU 0037308 |
| <i>Disa scullyi</i>                                | CPP-EC, Bastervoedpad              | Hobbhahn, s.n., BOL 2714                |
| <i>Disa thodei</i>                                 | CPP-EC, Naude's Nek                | Hobbhahn, 031, NU 0037300               |
| <i>Disa versicolor</i>                             | NAT, Mount Gilboa, Midlands        | Hobbhahn, s.n., BOL 2725                |
| <i>Disa woodii</i>                                 |                                    | Unknown, s.n., NU 0037321;<br>NU 003717 |
| <i>Disa zuluensis</i>                              | TVL-MP, Dullstroom district        | SD Johnson, s.n., NU 0037292            |

---

TABLE S2. Mean ( $\pm$  standard error) stomata and spur characteristics of *Disa* species with uncertain nectar status that were examined by scanning electron microscopy, but excluded from analysis. Order of taxa and species follows Bytebier *et al.* (2008). Sample sizes for number of stomata are given as ( $N_{\text{Specimens}}$ ), those for stomata size and spur-wall thickness as ( $N_{\text{Measurement}}$ ,  $N_{\text{Specimens}}$ ).

| Taxon                   | Number of stomata | Stoma area (mm <sup>2</sup> ) | Spur wall thickness (cell layers) |
|-------------------------|-------------------|-------------------------------|-----------------------------------|
| Ovalifoliae             |                   |                               |                                   |
| <i>Disa ovalifolia</i>  | 0 (3)             | -                             | 7 $\pm$ 0.8 (5, 2)                |
| Schizodium              |                   |                               |                                   |
| <i>Disa satyrioides</i> | 0 (1)             | -                             |                                   |
| Coryphaea               |                   |                               |                                   |
| <i>Disa triloba</i>     | 0 (1)             | -                             | 4 $\pm$ 0.3 (4, 1)                |
| Monadenia               |                   |                               |                                   |
| <i>Disa atrorubens</i>  | 32 (1)            | 1.76 $\pm$ 0.085 (5, 2)       | 7 $\pm$ 0.3 (3, 1)                |
| Spirales                |                   |                               |                                   |
| <i>Disa brachyceras</i> | 0 (2)             | -                             | 5 $\pm$ 0 (2, 1)                  |
| Stenocarpa              |                   |                               |                                   |
| <i>Disa aristata</i>    | 0 (1)             | -                             | 7 $\pm$ 0.3 (4, 1)                |
| Aconitoideae            |                   |                               |                                   |
| <i>Disa similis</i>     | 0 (1)             | -                             | 7 $\pm$ 0.4 (4, 1)                |
| Micranthae              |                   |                               |                                   |
| <i>Disa sanguinea</i>   | 0 (3)             | -                             | 6 $\pm$ 0.3 (3, 1)                |

TABLE S3. Reconstructed states from parsimony analyses of stomata occurrence ( $n = 60$  species) and nectary type ( $n = 103$  species) in *Disa*. For each tree that contains a given node, the state that was reconstructed as uniquely best for the node is identified, and the number of trees in which the uniquely best state occurred is summarized. Reconstruction of stomata occurrence: Optimal state: 0 = stomata absent, 1 = stomata present, - = no optimal state. Nectary-type reconstruction: 0 = nectary absent, 1 = stomatal nectary, 2 = secretory epidermis.

| Occurrence of stomata |                                 |               |                                    | Nectary type |                                 |               |                                    |      |                                 |               |                                    |
|-----------------------|---------------------------------|---------------|------------------------------------|--------------|---------------------------------|---------------|------------------------------------|------|---------------------------------|---------------|------------------------------------|
| Node                  | Number of trees containing node | Optimal state | Number of trees with optimal state | Node         | Number of trees containing node | Optimal state | Number of trees with optimal state | Node | Number of trees containing node | Optimal state | Number of trees with optimal state |
| 2                     | 1000                            | -             | 0                                  | 2            | 1000                            | 0             | 1000                               | 127  | 1000                            | 1             | 1000                               |
| 3                     | 1000                            | -             | 0                                  | 3            | 1000                            | 0             | 1000                               | 128  | 1000                            | 1             | 1000                               |
| 4                     | 1000                            | 0             | 1000                               | 4            | 1000                            | 2             | 1000                               | 131  | 349                             | 0             | 349                                |
| 7                     | 1000                            | -             | 0                                  | 5            | 1000                            | 0             | 1000                               | 132  | 465                             | 0             | 465                                |
| 9                     | 840                             | -             | 0                                  | 6            | 1000                            | 0             | 1000                               | 133  | 1000                            | 0             | 1000                               |
| 10                    | 1000                            | -             | 0                                  | 9            | 1000                            | 0             | 1000                               | 135  | 1000                            | 0             | 1000                               |
| 13                    | 1000                            | -             | 0                                  | 12           | 998                             | 0             | 998                                | 139  | 999                             | 0             | 999                                |
| 16                    | 1000                            | -             | 0                                  | 14           | 1000                            | 0             | 1000                               | 140  | 1000                            | 0             | 1000                               |
| 18                    | 1000                            | 0             | 145                                | 16           | 967                             | 0             | 967                                | 143  | 1000                            | 0             | 1000                               |
| 19                    | 1000                            | 0             | 1000                               | 19           | 1000                            | 0             | 1000                               | 144  | 1000                            | 0             | 1000                               |
| 21                    | 1000                            | 0             | 1000                               | 20           | 840                             | 0             | 840                                | 145  | 1000                            | 0             | 1000                               |
| 24                    | 1000                            | 0             | 145                                | 21           | 1000                            | 0             | 1000                               | 146  | 1000                            | 0             | 1000                               |
| 25                    | 1000                            | 0             | 1000                               | 24           | 1000                            | 0             | 1000                               | 149  | 1000                            | 0             | 1000                               |
| 27                    | 1000                            | 0             | 1000                               | 26           | 1000                            | 0             | 1000                               | 151  | 1000                            | 0             | 1000                               |
| 30                    | 1000                            | 0             | 145                                | 28           | 1000                            | 0             | 1000                               | 154  | 899                             | 0             | 899                                |
|                       |                                 | 1             | 145                                | 31           | 1000                            | 0             | 1000                               | 155  | 1000                            | 0             | 1000                               |

|    |      |   |      |    |      |   |      |     |      |   |      |
|----|------|---|------|----|------|---|------|-----|------|---|------|
| 31 | 994  | 0 | 144  | 34 | 1000 | 0 | 1000 | 156 | 579  | 0 | 579  |
| 32 | 1000 | 0 | 146  | 35 | 1000 | 0 | 1000 | 159 | 940  | 0 | 940  |
| 34 | 1000 | 0 | 1000 | 38 | 998  | 0 | 998  | 162 | 985  | 0 | 985  |
| 36 | 1000 | 0 | 1000 | 41 | 1000 | 0 | 1000 | 165 | 1000 | 0 | 1000 |
| 39 | 994  | 0 | 994  | 42 | 1000 | 0 | 1000 | 166 | 1000 | 0 | 1000 |
| 41 | 1000 | 0 | 1000 | 43 | 1000 | 0 | 1000 | 170 | 1000 | 0 | 1000 |
| 42 | 1000 | 0 | 1000 | 44 | 1000 | 0 | 1000 | 171 | 1000 | 0 | 1000 |
| 45 | 232  | 0 | 232  | 45 | 1000 | 0 | 1000 | 172 | 1000 | 2 | 1000 |
| 47 | 882  | 0 | 882  | 49 | 1000 | 0 | 1000 | 173 | 891  | 0 | 891  |
| 48 | 961  | 0 | 961  | 50 | 994  | 0 | 993  | 175 | 1000 | 0 | 1000 |
| 51 | 1000 | 0 | 1000 | 51 | 1000 | 0 | 1000 | 178 | 1000 | 0 | 1000 |
| 54 | 999  | 0 | 145  | 53 | 694  | 0 | 694  | 181 | 1000 | 0 | 1000 |
|    |      | 1 | 145  | 56 | 995  | 0 | 995  | 183 | 937  | 0 | 937  |
| 55 | 366  | 0 | 10   | 58 | 962  | 0 | 962  | 185 | 152  | 0 | 152  |
|    |      | 1 | 58   | 60 | 1000 | 0 | 1000 | 186 | 189  | 0 | 189  |
| 56 | 465  | 0 | 465  | 62 | 1000 | 0 | 1000 | 189 | 191  | 0 | 191  |
| 58 | 1000 | 0 | 1000 | 66 | 1000 | 0 | 1000 | 192 | 985  | 0 | 985  |
| 61 | 1000 | 0 | 1000 | 67 | 1000 | 0 | 1000 | 193 | 724  | 0 | 724  |
| 62 | 1000 | 0 | 1000 | 68 | 994  | 1 | 763  | 196 | 1000 | 0 | 1000 |
| 63 | 1000 | 0 | 1000 | 70 | 1000 | 0 | 1000 | 199 | 1000 | 0 | 1000 |
| 66 | 1000 | 0 | 1000 | 73 | 232  | 1 | 232  | 200 | 1000 | 0 | 1000 |
| 69 | 1000 | 0 | 1000 | 75 | 882  | 1 | 882  | 203 | 1000 | 0 | 1000 |
| 71 | 1000 | 0 | 1000 | 76 | 961  | 1 | 961  | 206 | 1000 | 0 | 1000 |
| 73 | 1000 | 0 | 1000 | 79 | 1000 | 1 | 1000 |     |      |   |      |
| 75 | 1000 | 0 | 1000 | 82 | 1000 | 0 | 1    |     |      |   |      |
| 77 | 899  | 0 | 899  |    |      |   | 763  |     |      |   |      |
| 80 | 349  | 0 | 12   | 83 | 999  | 0 | 999  |     |      |   |      |

|     |      |   |      |     |      |   |      |
|-----|------|---|------|-----|------|---|------|
|     |      | 1 | 62   | 84  | 366  | 0 | 366  |
| 81  | 568  | 0 | 3    | 85  | 568  | 0 | 568  |
|     |      | 1 | 183  | 87  | 1000 | 0 | 1000 |
| 83  | 1000 | 0 | 234  | 88  | 1000 | 0 | 1000 |
| 85  | 1000 | 0 | 234  | 90  | 698  | 0 | 698  |
| 88  | 115  | 0 | 23   | 93  | 1000 | 0 | 1000 |
| 90  | 1000 | 0 | 1000 | 96  | 115  | 0 | 115  |
| 92  | 1000 | 0 | 1000 | 98  | 1000 | 0 | 1000 |
| 93  | 1000 | 0 | 1000 | 99  | 1000 | 0 | 1000 |
| 95  | 1000 | 0 | 1000 | 100 | 1000 | 1 | 1000 |
| 97  | 1000 | 0 | 1000 | 102 | 910  | 1 | 910  |
| 100 | 946  | 0 | 946  | 104 | 1000 | 1 | 1000 |
| 102 | 999  | 0 | 999  | 109 | 1000 | 1 | 1000 |
| 103 | 910  | 0 | 910  | 110 | 1000 | 1 | 1000 |
| 105 | 1000 | 0 | 1000 | 111 | 1000 | 1 | 1000 |
| 107 | 1000 | 0 | 1000 | 113 | 997  | 1 | 997  |
| 109 | 1000 | 0 | 1000 | 118 | 1000 | 1 | 1000 |
| 112 | 1000 | 0 | 1000 | 119 | 1000 | 1 | 1000 |
| 114 | 997  | 0 | 997  | 120 | 999  | 1 | 999  |
| 116 | 1000 | 0 | 1000 | 121 | 946  | 1 | 946  |
| 118 | 1000 | 0 | 1000 | 124 | 1000 | 1 | 1000 |

FIG. S1. Ancestral state reconstruction of the occurrence of stomata in *Disa* by parsimony. Results from 1000 chronograms summarized on the maximum-clade credibility chronogram containing 60 species. Species highlighted in yellow produce nectar. Node colours: white = stomata absent, black = stomata present, grey = equivocal. For support values of all nodes (Fig. S2) see Table S3.

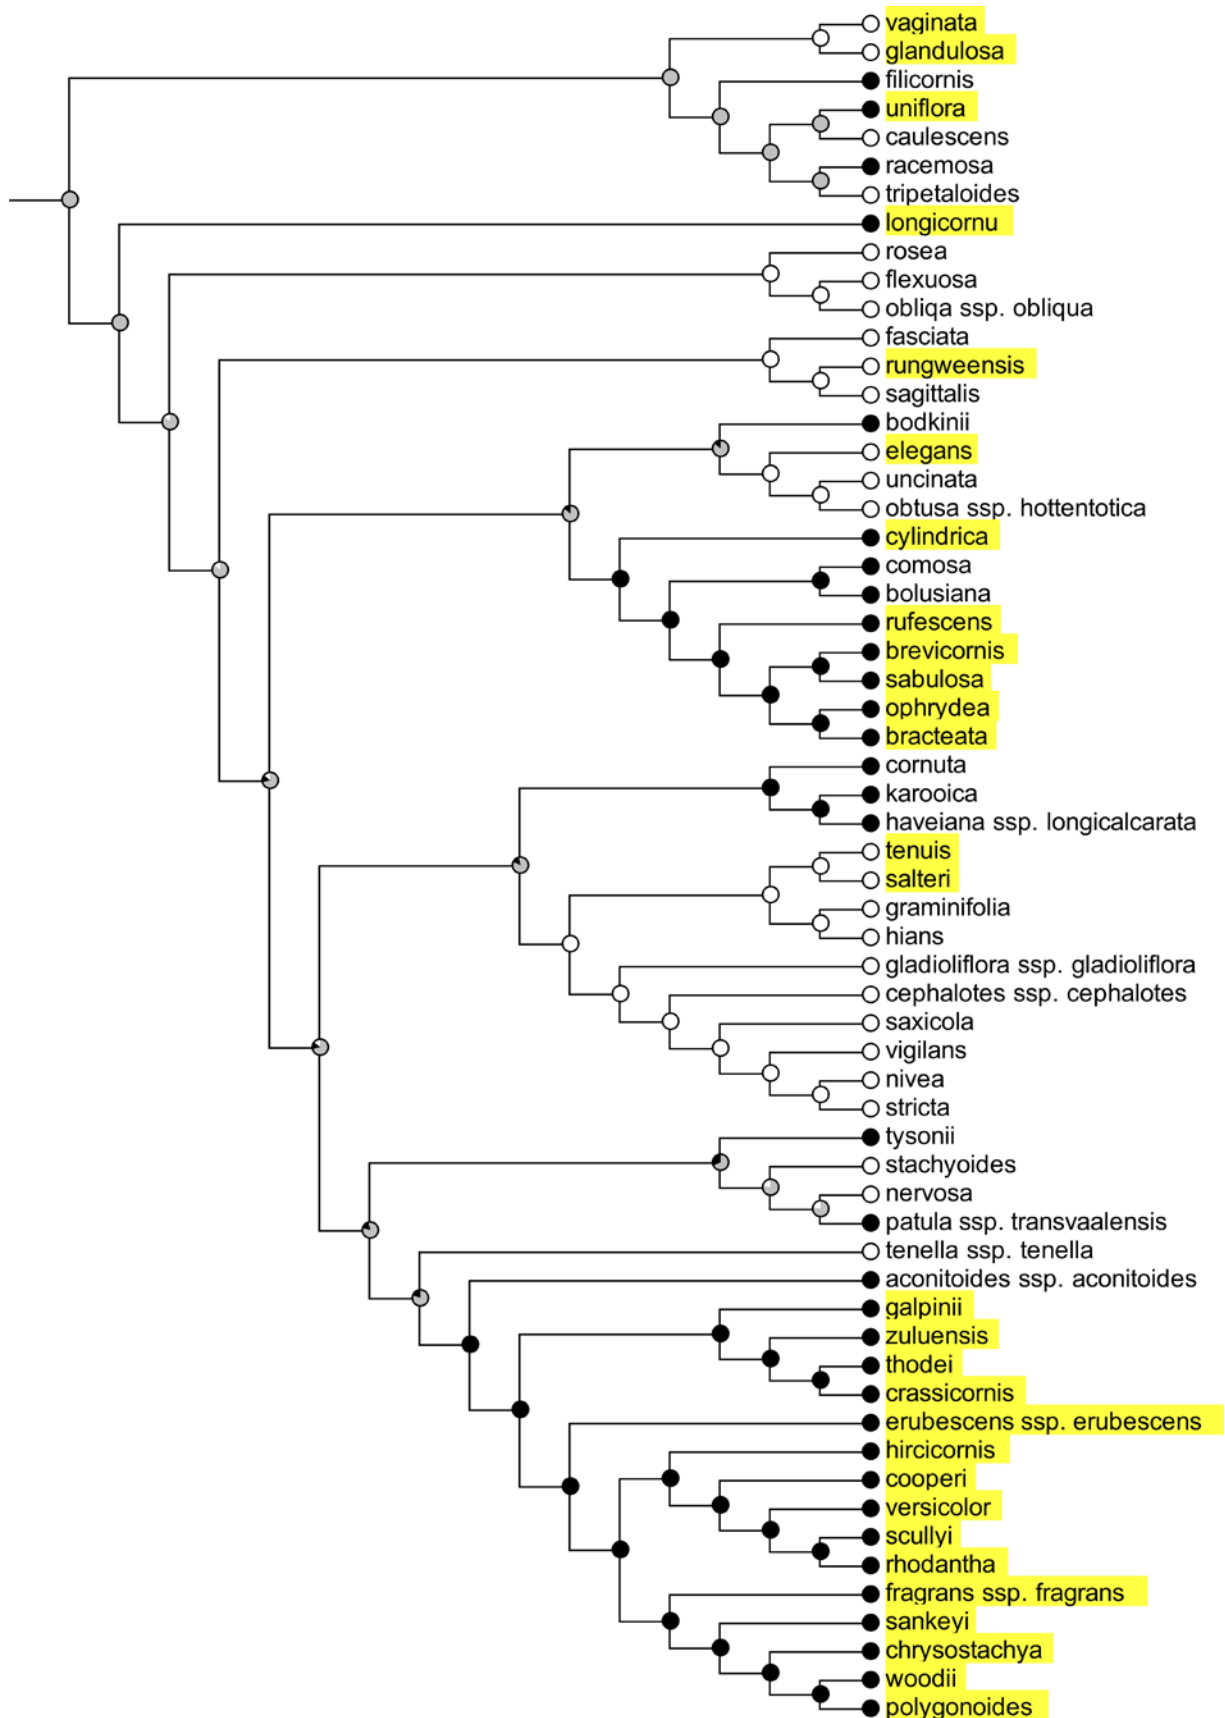



FIG. S2. Node numbers associated with ancestral state reconstruction of stomata occurrence on the maximum-clade credibility chronogram containing 60 species (Fig. S1), see Table S3 for support values for each node. Branch lengths are not representative of clade age. Species highlighted in yellow produce nectar.

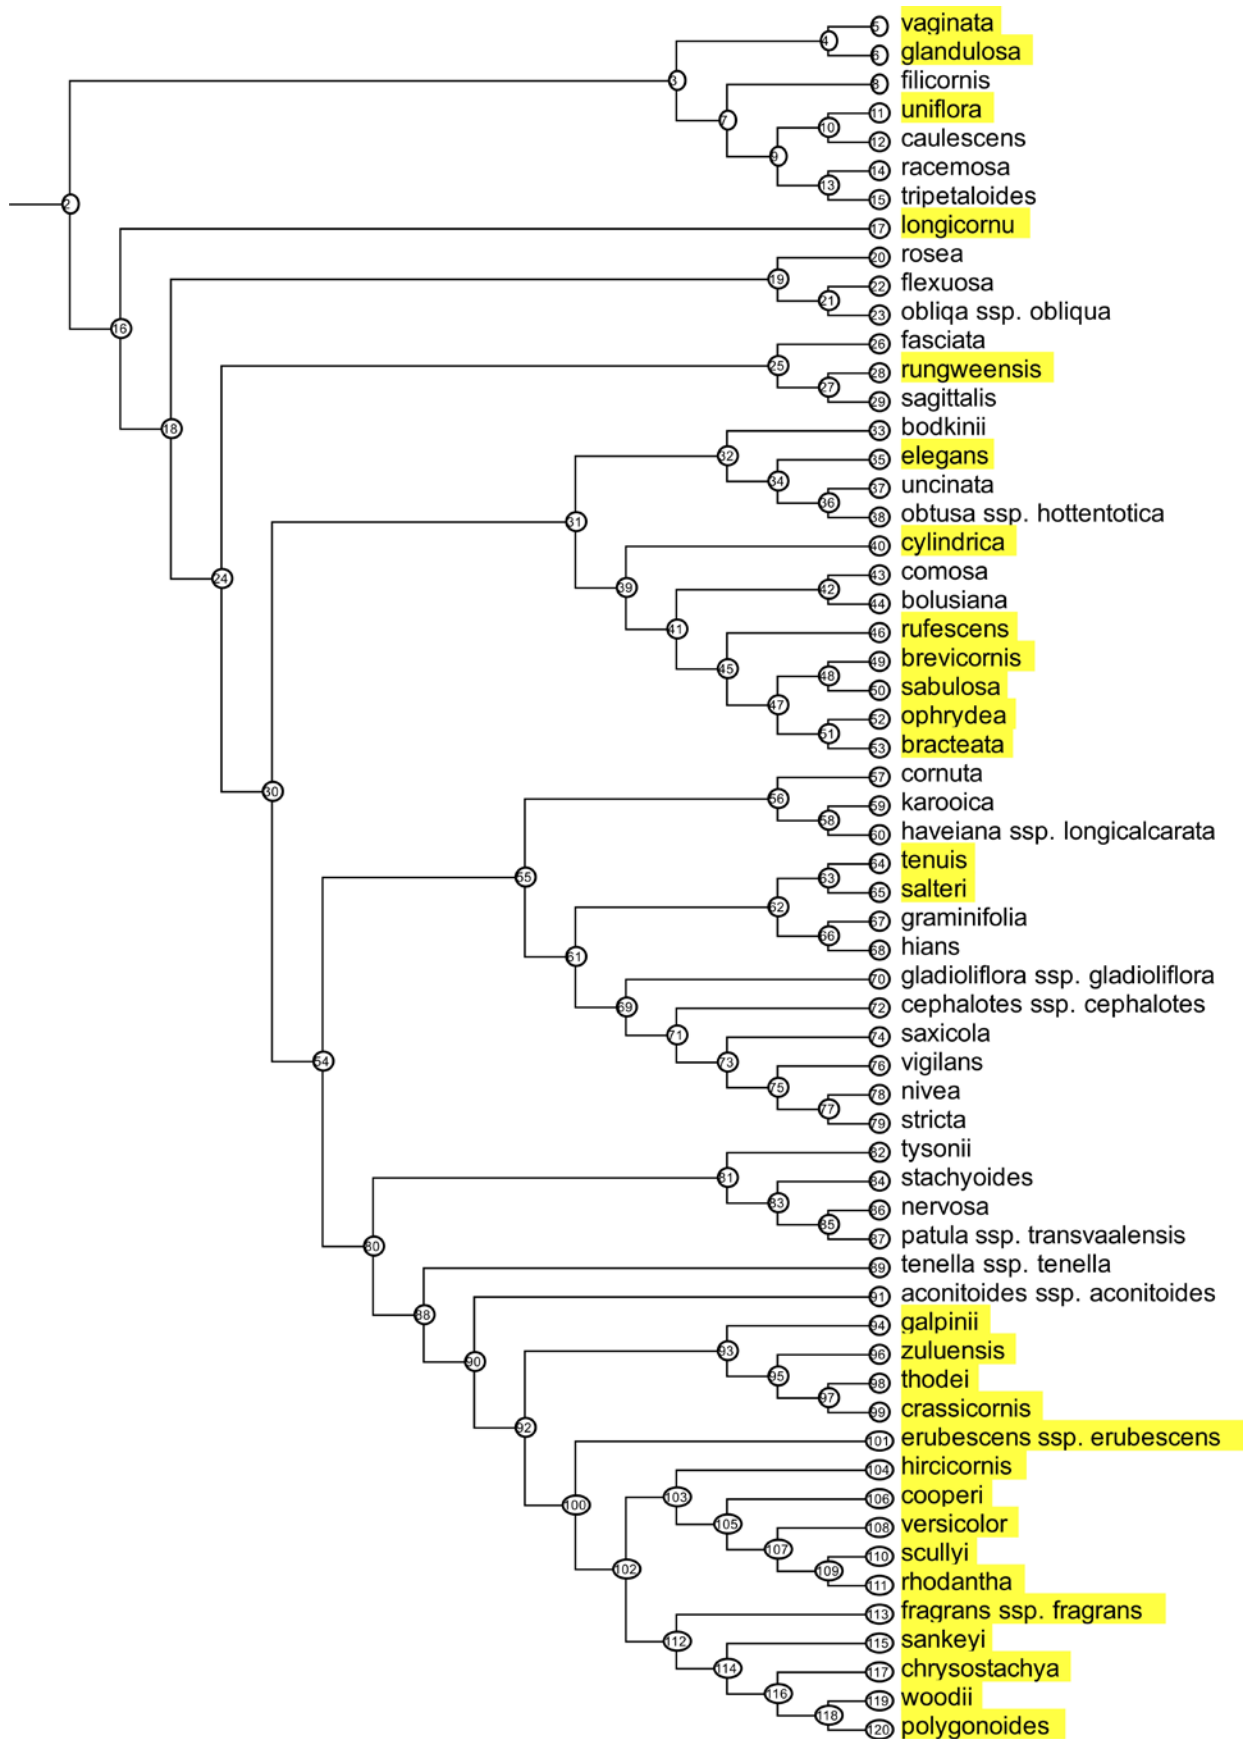

FIG. S3. Node numbers associated with ancestral state reconstruction of nectary type by parsimony on the maximum-clade credibility chronogram containing 103 species (Fig. 5), see Table S3 for support values for each node. Branch lengths are not representative of clade age. Species highlighted in yellow produce nectar.

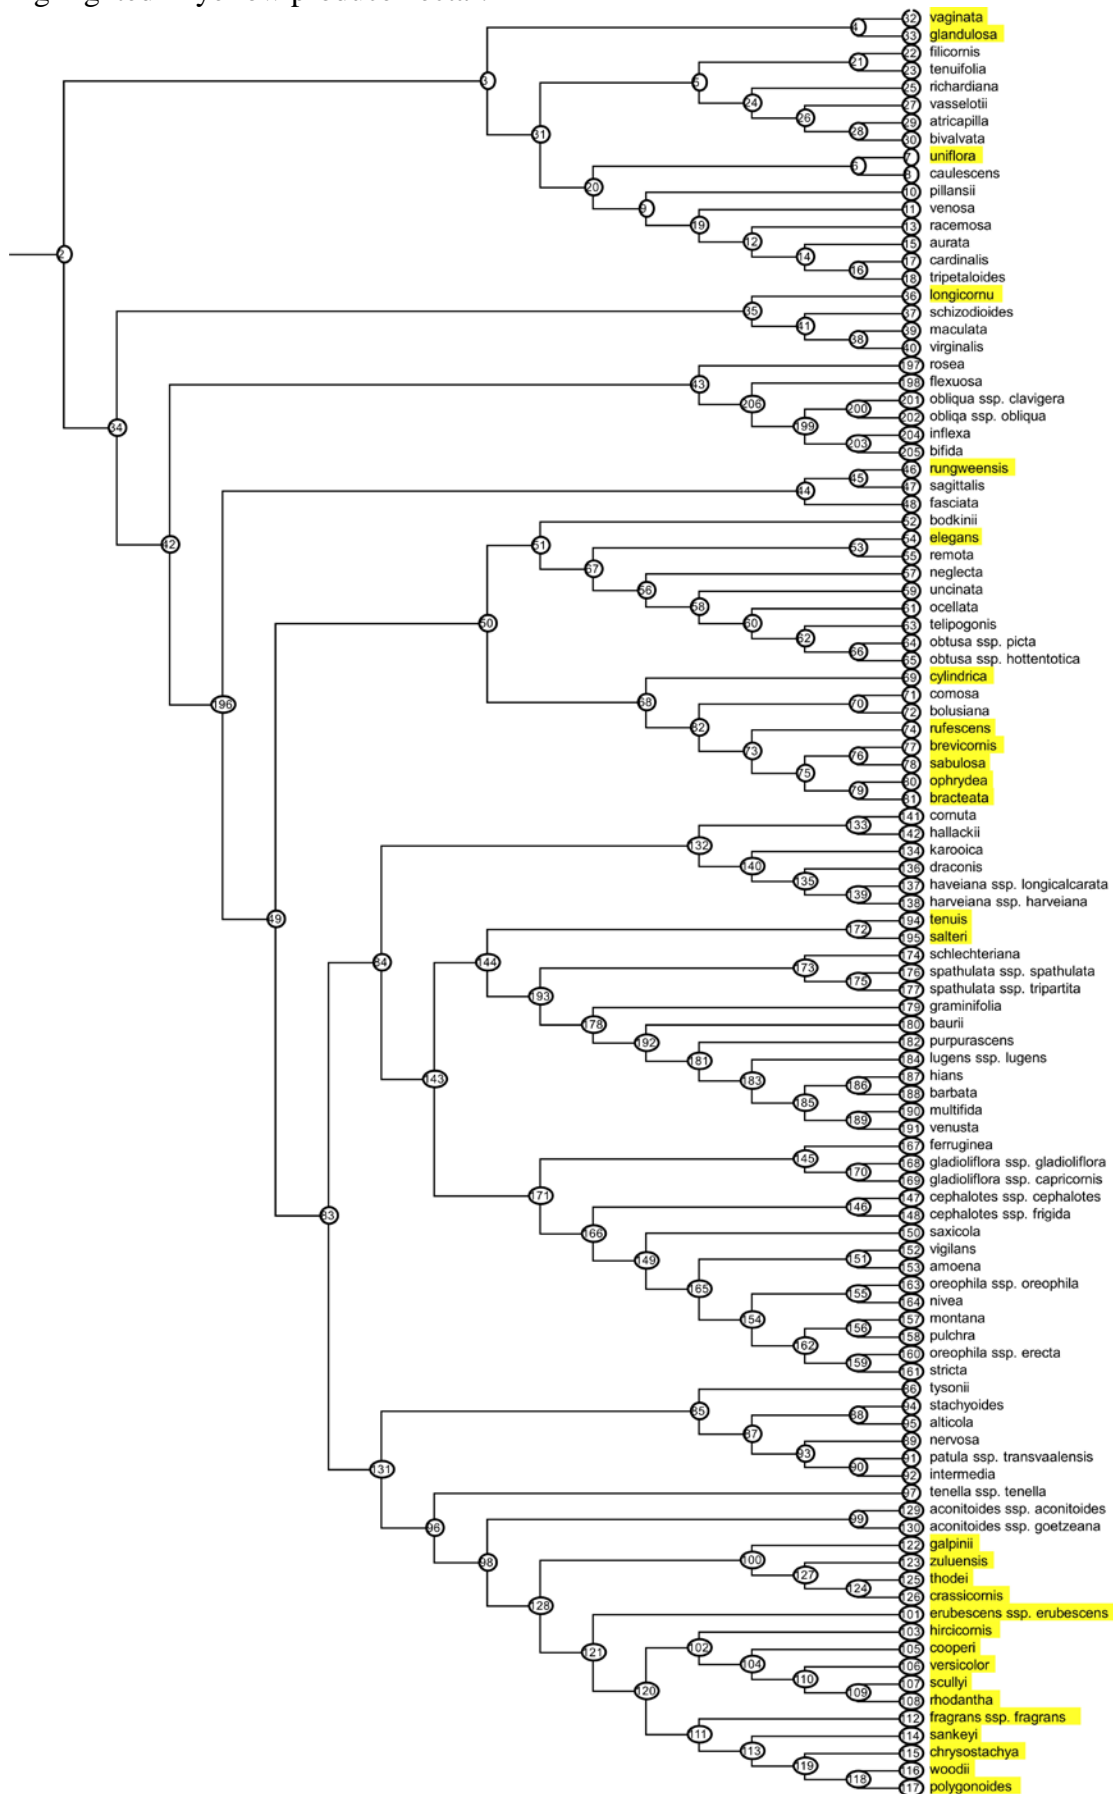

FIG. S4: Frequency distributions of  $P$  values obtained from 1000 chronograms used to account for phylogenetic uncertainty in tests for phylogenetic signal in continuous traits, and in comparisons using phylogenetic generalized estimating equations (pGEEs). (A-C) Tests for phylogenetic signal of stomata number (A) and size (B), and spur-wall thickness (C). (D-H) Comparisons between nectarless and nectar-producing species of stomata number on all examined flower parts (D) and in spurs only (E), of stoma area on all examined flower parts (F) and in spurs only (G), and of spur-wall thickness including (light grey bars) and excluding (dark grey bars) *Disa uniflora* (H). (I-J) Comparisons between sections *Monadenia* and *Micranthae* of stomata number (I) and size (J), and of spur-wall thickness (K). (L) Comparison of spur-wall thickness between species with secretory epidermis and stomatal nectaries. Dotted lines indicate  $P = 0.05$ .

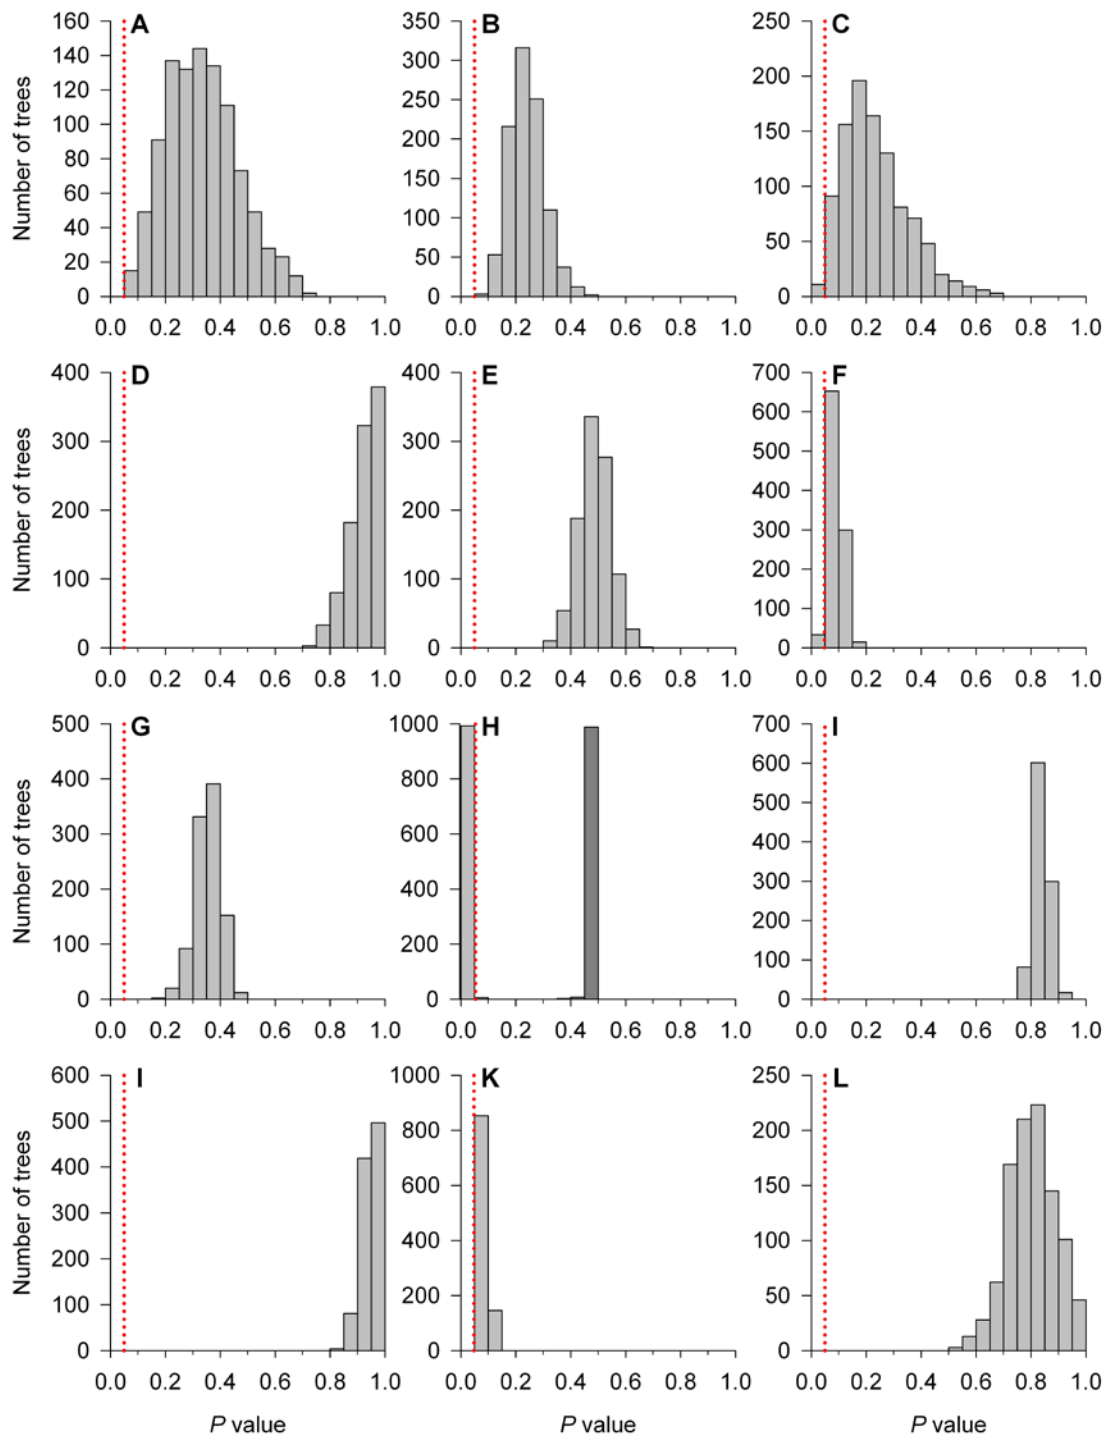

FIG. S5: Scanning electron micrographs of spur tissues of the examined *Brownleea* species. a, b: *Brownleea galpinii*, representative epidermis cells of spur (a) and spur tip (b). c, d: *B. macroceras*, representative epidermis cells of spur (c) and spur tip (d). Cells in (d) collapsed during critical-point drying, causing prominent lateral cell walls. e-f: *B. parviflora*, unicellular trichomes in spur entrance (e), spur overview (f), representative spur epidermis cells (g). Scale bars: a, b, d, 50  $\mu\text{m}$ ; c, 100  $\mu\text{m}$ ; e, g, 75  $\mu\text{m}$ ; f, 1 mm.

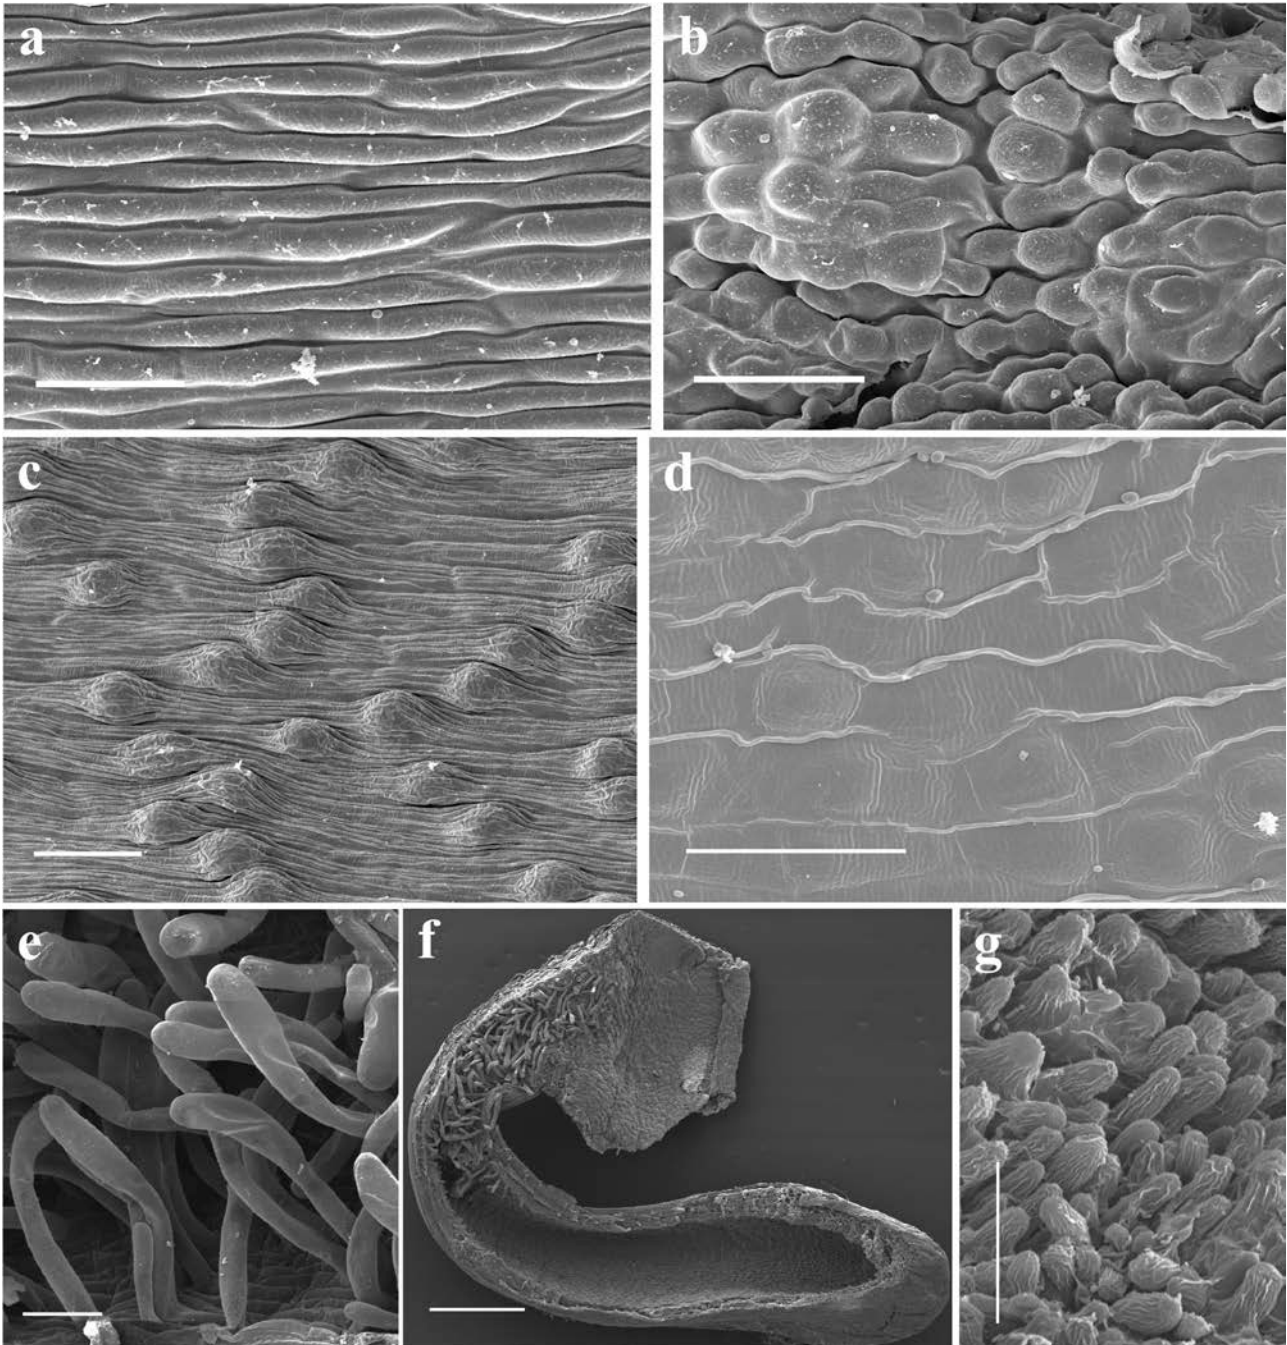

## LITERATURE CITED

- Brummitt RK. 2001.** World geographical scheme for recording plant distributions. *International Working Group on Taxonomic Plant Sciences*. 2 ed. Pittsburgh, Hunt Institute for Botanical Documentation.
- Bytebier B, Bellstedt DU, Linder HP. 2008.** A new phylogeny-based sectional classification for the large African orchid genus *Disa*. *Taxon* **57**: 1233–1251.
